# Supplementary material
Source: Springer Nature journal article supplement (https://www.springermedizin.de/resource/supplementary/13256_2011_2124_MOESM10_ESM.pdf/9649076)

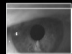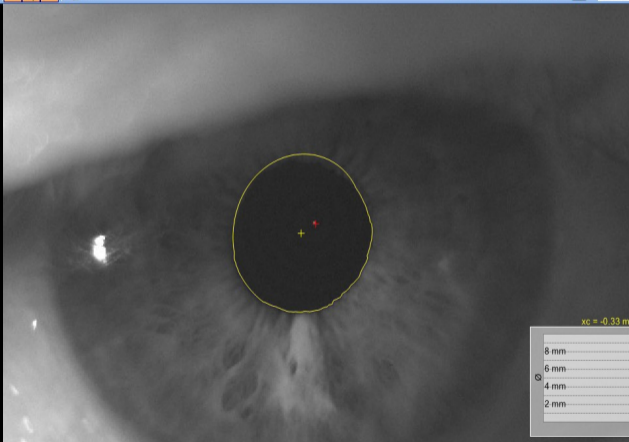

OD

 $xc = -0.33 \text{ mm}, yc = 0.19 \text{ mm}, \varnothing = 3.14 \text{ mm}$ 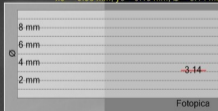

Supplement: MOESM10 [file 9649076]
